# Supplementary material
Source: HighWire-hosted journal article supplement (https://bmjopen.bmj.com/content/12/6/e056147)
Supplement: inline-supplementary-material-1 [file inline-supplementary-material-1.pdf]

Myeloma XIV Supplementary Material to Protocol Paper  
EudraCT number: **2018-003590-10**

## **Supplementary Material:**

### **Contents**

|                                                                              |    |
|------------------------------------------------------------------------------|----|
| Glossary of Terms.....                                                       | 2  |
| List of Sites in the Fitness Trial.....                                      | 4  |
| Spirit Checklist : Reporting checklist for protocol of a clinical trial..... | 5  |
| Renal and Liver Function .....                                               | 11 |
| Concomitant Medication .....                                                 | 12 |
| Exploratory analysis.....                                                    | 13 |
| Subgroup analysis.....                                                       | 13 |
| Informed Consent Material .....                                              | 15 |
| Bone marrow and Blood sample consent form .....                              | 15 |
| Main Trial consent.....                                                      | 18 |
| Central Sample Analysis.....                                                 | 21 |
| References .....                                                             | 23 |

Myeloma XIV Supplementary Material to Protocol Paper  
EudraCT number: **2018-003590-10**

Glossary of Terms

|       |                                                |
|-------|------------------------------------------------|
| AE    | Adverse event                                  |
| ADL   | Katz Activity of Daily Living                  |
| ALT   | Alanine aminotransferase                       |
| AR    | Adverse reaction                               |
| ANC   | Absolute Neutrophil Count                      |
| AST   | Aspartate aminotransferase                     |
| β2M   | Beta2-microglobulin                            |
| CCI   | Charlson Comorbidity Index                     |
| CI    | Chief Investigator                             |
| CR    | Complete response                              |
| CRF   | Case report form                               |
| CTCAE | Common Terminology Criteria for Adverse Events |
| CTRU  | Clinical Trials Research Unit                  |
| DMEC  | Data Monitoring and Ethics Committee           |
| eCRF  | Electronic Case Report Form                    |
| GI    | Gastrointestinal                               |
| HEAP  | Health Economics Analysis Plan                 |
| HMDS  | Haematological Malignancy Diagnostic Service   |
| IADL  | Lawton Instrumental Activity of Daily Living   |
| IMiD  | Immunomodulatory Drug                          |
| IMP   | Investigational medicinal product              |
| IMWG  | International Myeloma Working Group            |
| ITT   | Intention to treat                             |
| mg    | Milligram                                      |
| MM    | Multiple myeloma                               |
| MRD   | Minimal Residual Disease                       |
| MR    | Minimal response                               |
| NCI   | National Cancer Institute                      |
| ORR   | Overall response rate                          |
| OS    | Overall survival                               |
| PD    | Progressive disease                            |
| PFS   | Progression-free survival                      |
| PFS2  | Time from randomisation to second progression  |
| PK    | Pharmacokinetic(s)                             |
| PI    | Proteasome Inhibitor                           |
| PR    | Partial response                               |
| PS    | Performance status                             |
| QoL   | Quality of life                                |
| R1    | Randomisation 1                                |
| R2    | Randomisation 2                                |
| REC   | Research Ethics Committee                      |
| SD    | Stable disease                                 |
| SAE   | Serious adverse event                          |
| SAR   | Serious adverse reaction                       |
| SPM   | Secondary Primary Malignancy                   |
| SmPC  | Summary of product characteristics             |

Myeloma XIV Supplementary Material to Protocol Paper  
EudraCT number: **2018-003590-10**

|        |                                               |
|--------|-----------------------------------------------|
| SUSAR  | Suspected unexpected serious adverse reaction |
| TMG    | Trial Management Group                        |
| TNE    | Transplant non-eligible                       |
| TSC    | Trial Steering Committee                      |
| UK-MRA | United Kingdom Myeloma Research Alliance      |
| ULN    | Upper Limit of normal                         |
| VGPR   | Very good partial response                    |
| VTE    | Venous thromboembolism                        |

Myeloma XIV Supplementary Material to Protocol Paper  
EudraCT number: **2018-003590-10**

List of Sites in the Fitness Trial

| Sites                                 |                                           |                                     |
|---------------------------------------|-------------------------------------------|-------------------------------------|
| Aberdeen Royal Infirmary              | Kettering general                         | Salford Royal Hospital              |
| Blackpool Victoria                    | Kidderminster Hospital                    | Salisbury District Hospital         |
| Bristol Haematology & Oncology Centre | Kings College Hospital, Denmark Hill      | South Tyneside Hospital             |
| Calderdale Royal Hospital             | Leicester Royal Infirmary                 | Southampton Hospital                |
| Castle Hill Hospital                  | Lincoln County Hospital                   | Southmead Hospital                  |
| Cheltenham Hospital                   | Maidstone Hospital                        | St Bartholomew Hospital             |
| Clatterbridge Cancer Centre           | Manchester Royal Infirmary                | St George's Hospital, Tooting       |
| Colchester District                   | New Cross Hospital                        | St Helens Hospital                  |
| Countess of Chester                   | Ninewells                                 | St Helier Hospital                  |
| County Hospital                       | Norfolk & Norwich University Hospital     | St Richard's Hospital               |
| Croydon University Hospital           | Nottingham City Hospital                  | St. James's University Hospital     |
| Derriford Hospital                    | Peterborough City Hospital                | St. John's. Hospital, Howden        |
| Dewsbury and District Hospital        | Pilgrim Hospital                          | Sunderland Royal Hospital           |
| Dewsbury and District Hospital        | Pontefract Hospital                       | The County Hospital, Wye Valley     |
| Epsom General Hospital                | Princess Royal                            | Torbay Hospital                     |
| Freeman Hospital                      | Queen Alexandra Hospital                  | TRAFFORD GENERAL HOSPITAL           |
| Friarage Hospital                     | Queen Elizabeth Hospital the Queen Mother | University College London Hospital  |
| Glan Clywd                            | Queen Elizabeth Hospital, Birmingham      | Western General                     |
| Gloucestershire Royal                 | Queen Elizabeth Hospital, King's Lynn     | Whiston Hospital                    |
| Goodhope                              | Queens Hospital, Romford                  | William Harvey                      |
| Grantham & District                   | Royal Albert Edward Infirmary             | Worcestershire Royal Hospital       |
| Guys Hospital                         | Royal Berkshire                           | Worcestershire Royal Hospital       |
| Harrogate District Hospital           | Royal Bournemouth General                 | Worthing Hospital                   |
| Heartlands                            | Royal Derby                               | Wrexham Maelor Hospital             |
| Hillingdon Hospital                   | Royal Devon & Exeter Hospital             | Wythenshaw Hospital                 |
| Hinchingbrooke Hospital               | Royal Oldham                              | YSBYTY GWYNEDD                      |
| Huddersfield Royal Infirmary          | Royal Stoke University Hospital           | North Middlesex University Hospital |
| James Cook University Hospital        | Royal United Hospital, Bath               | Royal Hallamshire                   |
| Kent & Canterbury Hospital            | Russells Hall Hospital                    |                                     |

\*In total the trial will be conducted in 87 centres around the UK

Myeloma XIV Supplementary Material to Protocol Paper  
EudraCT number: **2018-003590-10**

Spirit Checklist : Reporting checklist for protocol of a clinical trial.

Based on the SPIRIT guidelines.

Chan A-W, Tetzlaff JM, Gøtzsche PC, Altman DG, Mann H, Berlin J, Dickersin K, Hróbjartsson A, Schulz KF, Parulekar WR, Krleža-Jerić K, Laupacis A, Moher D. SPIRIT 2013 Explanation and Elaboration: Guidance for protocols of clinical trials. *BMJ*. 2013;346:e7586

|                                                         |                     | Reporting Item                                                                                                                                                                                                                                                                           | Page Number |
|---------------------------------------------------------|---------------------|------------------------------------------------------------------------------------------------------------------------------------------------------------------------------------------------------------------------------------------------------------------------------------------|-------------|
| <b>Administrative information</b>                       |                     |                                                                                                                                                                                                                                                                                          |             |
| Title                                                   | <a href="#">#1</a>  | Descriptive title identifying the study design, population, interventions, and, if applicable, trial acronym                                                                                                                                                                             | 1           |
| Trial registration                                      | <a href="#">#2a</a> | Trial identifier and registry name. If not yet registered, name of intended registry                                                                                                                                                                                                     | 1,2         |
| Trial registration: data set                            | <a href="#">#2b</a> | All items from the World Health Organization Trial Registration Data Set                                                                                                                                                                                                                 | NA          |
| Protocol version                                        | <a href="#">#3</a>  | Date and version identifier                                                                                                                                                                                                                                                              | 18          |
| Funding                                                 | <a href="#">#4</a>  | Sources and types of financial, material, and other support                                                                                                                                                                                                                              | 20          |
| Roles and responsibilities: contributorship             | <a href="#">#5a</a> | Names, affiliations, and roles of protocol contributors                                                                                                                                                                                                                                  | 1, 20       |
| Roles and responsibilities: sponsor contact information | <a href="#">#5b</a> | Name and contact information for the trial sponsor                                                                                                                                                                                                                                       | 20          |
| Roles and responsibilities: sponsor and funder          | <a href="#">#5c</a> | Role of study sponsor and funders, if any, in study design; collection, management, analysis, and interpretation of data; writing of the report; and the decision to submit the report for publication, including whether they will have ultimate authority over any of these activities | 20,21       |
| Roles and responsibilities: committees                  | <a href="#">#5d</a> | Composition, roles, and responsibilities of the coordinating centre, steering committee, endpoint adjudication committee, data management team, and other individuals or groups overseeing the trial, if applicable (see Item 21a for data monitoring committee)                         | 16          |

**Introduction**

Myeloma XIV Supplementary Material to Protocol Paper  
EudraCT number: **2018-003590-10**

|                                                               |                      |                                                                                                                                                                                                            |       |
|---------------------------------------------------------------|----------------------|------------------------------------------------------------------------------------------------------------------------------------------------------------------------------------------------------------|-------|
| Background and rationale                                      | <a href="#">#6a</a>  | Description of research question and justification for undertaking the trial, including summary of relevant studies (published and unpublished) examining benefits and harms for each intervention         | 4,5   |
| Background and rationale: choice of comparators               | <a href="#">#6b</a>  | Explanation for choice of comparators                                                                                                                                                                      | 4,5,6 |
| Objectives                                                    | <a href="#">#7</a>   | Specific objectives or hypotheses                                                                                                                                                                          | 6     |
| Trial design                                                  | <a href="#">#8</a>   | Description of trial design including type of trial (eg, parallel group, crossover, factorial, single group), allocation ratio, and framework (eg, superiority, equivalence, non-inferiority, exploratory) | 6     |
| <b>Methods:<br/>Participants, interventions, and outcomes</b> |                      |                                                                                                                                                                                                            |       |
| Study setting                                                 | <a href="#">#9</a>   | Description of study settings (eg, community clinic, academic hospital) and list of countries where data will be collected. Reference to where list of study sites can be obtained                         | 6     |
| Eligibility criteria                                          | <a href="#">#10</a>  | Inclusion and exclusion criteria for participants. If applicable, eligibility criteria for study centres and individuals who will perform the interventions (eg, surgeons, psychotherapists)               | 6     |
| Interventions: description                                    | <a href="#">#11a</a> | Interventions for each group with sufficient detail to allow replication, including how and when they will be administered                                                                                 | 9     |
| Interventions: modifications                                  | <a href="#">#11b</a> | Criteria for discontinuing or modifying allocated interventions for a given trial participant (eg, drug dose change in response to harms, participant request, or improving / worsening disease)           | 9,10  |
| Interventions: adherence                                      | <a href="#">#11c</a> | Strategies to improve adherence to intervention protocols, and any procedures for monitoring adherence (eg, drug tablet return; laboratory tests)                                                          | 10    |
| Interventions: concomitant care                               | <a href="#">#11d</a> | Relevant concomitant care and interventions that are permitted or prohibited during the trial                                                                                                              | 10    |

Myeloma XIV Supplementary Material to Protocol Paper  
EudraCT number: **2018-003590-10**

|                                                            |                      |                                                                                                                                                                                                                                                                                                                                                                                |       |
|------------------------------------------------------------|----------------------|--------------------------------------------------------------------------------------------------------------------------------------------------------------------------------------------------------------------------------------------------------------------------------------------------------------------------------------------------------------------------------|-------|
| Outcomes                                                   | <a href="#">#12</a>  | Primary, secondary, and other outcomes, including the specific measurement variable (eg, systolic blood pressure), analysis metric (eg, change from baseline, final value, time to event), method of aggregation (eg, median, proportion), and time point for each outcome. Explanation of the clinical relevance of chosen efficacy and harm outcomes is strongly recommended | 11    |
| Participant timeline                                       | <a href="#">#13</a>  | Time schedule of enrolment, interventions (including any run-ins and washouts), assessments, and visits for participants. A schematic diagram is highly recommended (see Figure)                                                                                                                                                                                               | 11,12 |
| Sample size                                                | <a href="#">#14</a>  | Estimated number of participants needed to achieve study objectives and how it was determined, including clinical and statistical assumptions supporting any sample size calculations                                                                                                                                                                                          | 12,13 |
| Recruitment                                                | <a href="#">#15</a>  | Strategies for achieving adequate participant enrolment to reach target sample size                                                                                                                                                                                                                                                                                            | 13    |
| <b>Methods:</b>                                            |                      |                                                                                                                                                                                                                                                                                                                                                                                |       |
| <b>Assignment of interventions (for controlled trials)</b> |                      |                                                                                                                                                                                                                                                                                                                                                                                |       |
| Allocation: sequence generation                            | <a href="#">#16a</a> | Method of generating the allocation sequence (eg, computer-generated random numbers), and list of any factors for stratification. To reduce predictability of a random sequence, details of any planned restriction (eg, blocking) should be provided in a separate document that is unavailable to those who enrol participants or assign interventions                       | 13,14 |
| Allocation concealment mechanism                           | <a href="#">#16b</a> | Mechanism of implementing the allocation sequence (eg, central telephone; sequentially numbered, opaque, sealed envelopes), describing any steps to conceal the sequence until interventions are assigned                                                                                                                                                                      | 13    |
| Allocation: implementation                                 | <a href="#">#16c</a> | Who will generate the allocation sequence, who will enrol participants, and who will assign participants to interventions                                                                                                                                                                                                                                                      | 14    |
| Blinding (masking)                                         | <a href="#">#17a</a> | Who will be blinded after assignment to interventions (eg, trial participants, care                                                                                                                                                                                                                                                                                            | 14    |

Myeloma XIV Supplementary Material to Protocol Paper  
EudraCT number: **2018-003590-10**

|                                                                       |                      |                                                                                                                                                                                                                                                                                                                                                                                                                                      |       |
|-----------------------------------------------------------------------|----------------------|--------------------------------------------------------------------------------------------------------------------------------------------------------------------------------------------------------------------------------------------------------------------------------------------------------------------------------------------------------------------------------------------------------------------------------------|-------|
|                                                                       |                      | providers, outcome assessors, data analysts),<br>and how                                                                                                                                                                                                                                                                                                                                                                             |       |
| Blinding (masking):<br>emergency<br>unblinding                        | <a href="#">#17b</a> | If blinded, circumstances under which<br>unblinding is permissible, and procedure for<br>revealing a participant's allocated intervention<br>during the trial                                                                                                                                                                                                                                                                        | 14    |
| <b>Methods: Data<br/>collection,<br/>management, and<br/>analysis</b> |                      |                                                                                                                                                                                                                                                                                                                                                                                                                                      |       |
| Data collection plan                                                  | <a href="#">#18a</a> | Plans for assessment and collection of outcome,<br>baseline, and other trial data, including any<br>related processes to promote data quality (eg,<br>duplicate measurements, training of assessors)<br>and a description of study instruments (eg,<br>questionnaires, laboratory tests) along with<br>their reliability and validity, if known. Reference<br>to where data collection forms can be found, if<br>not in the protocol | 14    |
| Data collection<br>plan: retention                                    | <a href="#">#18b</a> | Plans to promote participant retention and<br>complete follow-up, including list of any<br>outcome data to be collected for participants<br>who discontinue or deviate from intervention<br>protocols                                                                                                                                                                                                                                | 14    |
| Data management                                                       | <a href="#">#19</a>  | Plans for data entry, coding, security, and<br>storage, including any related processes to<br>promote data quality (eg, double data entry;<br>range checks for data values). Reference to<br>where details of data management procedures<br>can be found, if not in the protocol                                                                                                                                                     | 14,15 |
| Statistics: outcomes                                                  | <a href="#">#20a</a> | Statistical methods for analysing primary and<br>secondary outcomes. Reference to where other<br>details of the statistical analysis plan can be<br>found, if not in the protocol                                                                                                                                                                                                                                                    | 15,16 |
| Statistics: additional<br>analyses                                    | <a href="#">#20b</a> | Methods for any additional analyses (eg,<br>subgroup and adjusted analyses)                                                                                                                                                                                                                                                                                                                                                          | 16    |
| Statistics: analysis<br>population and<br>missing data                | <a href="#">#20c</a> | Definition of analysis population relating to<br>protocol non-adherence (eg, as randomised<br>analysis), and any statistical methods to handle<br>missing data (eg, multiple imputation)                                                                                                                                                                                                                                             | 16,17 |
| <b>Methods:<br/>Monitoring</b>                                        |                      |                                                                                                                                                                                                                                                                                                                                                                                                                                      |       |



Myeloma XIV Supplementary Material to Protocol Paper  
EudraCT number: **2018-003590-10**

|                                         |                      |                                                                                                                                                                                                                                                                                                                                       |       |
|-----------------------------------------|----------------------|---------------------------------------------------------------------------------------------------------------------------------------------------------------------------------------------------------------------------------------------------------------------------------------------------------------------------------------|-------|
| Data monitoring:<br>formal committee    | <a href="#">#21a</a> | Composition of data monitoring committee (DMC); summary of its role and reporting structure; statement of whether it is independent from the sponsor and competing interests; and reference to where further details about its charter can be found, if not in the protocol. Alternatively, an explanation of why a DMC is not needed | 16,17 |
| Data monitoring:<br>interim analysis    | <a href="#">#21b</a> | Description of any interim analyses and stopping guidelines, including who will have access to these interim results and make the final decision to terminate the trial                                                                                                                                                               | 16,17 |
| Harms                                   | <a href="#">#22</a>  | Plans for collecting, assessing, reporting, and managing solicited and spontaneously reported adverse events and other unintended effects of trial interventions or trial conduct                                                                                                                                                     | 17,18 |
| Auditing                                | <a href="#">#23</a>  | Frequency and procedures for auditing trial conduct, if any, and whether the process will be independent from investigators and the sponsor                                                                                                                                                                                           | 18    |
| <b>Ethics and dissemination</b>         |                      |                                                                                                                                                                                                                                                                                                                                       |       |
| Research ethics approval                | <a href="#">#24</a>  | Plans for seeking research ethics committee / institutional review board (REC / IRB) approval                                                                                                                                                                                                                                         | 18    |
| Protocol amendments                     | <a href="#">#25</a>  | Plans for communicating important protocol modifications (eg, changes to eligibility criteria, outcomes, analyses) to relevant parties (eg, investigators, REC / IRBs, trial participants, trial registries, journals, regulators)                                                                                                    | 18    |
| Consent or assent                       | <a href="#">#26a</a> | Who will obtain informed consent or assent from potential trial participants or authorised surrogates, and how (see Item 32)                                                                                                                                                                                                          | 19    |
| Consent or assent:<br>ancillary studies | <a href="#">#26b</a> | Additional consent provisions for collection and use of participant data and biological specimens in ancillary studies, if applicable                                                                                                                                                                                                 | 19    |
| Confidentiality                         | <a href="#">#27</a>  | How personal information about potential and enrolled participants will be collected, shared, and maintained in order to protect confidentiality before, during, and after the trial                                                                                                                                                  | 19    |
| Declaration of interests                | <a href="#">#28</a>  | Financial and other competing interests for principal investigators for the overall trial and each study site                                                                                                                                                                                                                         | 20,21 |

Myeloma XIV Supplementary Material to Protocol Paper  
EudraCT number: **2018-003590-10**

|                                             |                      |                                                                                                                                                                                                                                                                                     |                                |
|---------------------------------------------|----------------------|-------------------------------------------------------------------------------------------------------------------------------------------------------------------------------------------------------------------------------------------------------------------------------------|--------------------------------|
| Data access                                 | <a href="#">#29</a>  | Statement of who will have access to the final trial dataset, and disclosure of contractual agreements that limit such access for investigators                                                                                                                                     | 19                             |
| Ancillary and post trial care               | <a href="#">#30</a>  | Provisions, if any, for ancillary and post-trial care, and for compensation to those who suffer harm from trial participation                                                                                                                                                       | 19                             |
| Dissemination policy: trial results         | <a href="#">#31a</a> | Plans for investigators and sponsor to communicate trial results to participants, healthcare professionals, the public, and other relevant groups (eg, via publication, reporting in results databases, or other data sharing arrangements), including any publication restrictions | 19                             |
| Dissemination policy: authorship            | <a href="#">#31b</a> | Authorship eligibility guidelines and any intended use of professional writers                                                                                                                                                                                                      | 19                             |
| Dissemination policy: reproducible research | <a href="#">#31c</a> | Plans, if any, for granting public access to the full protocol, participant-level dataset, and statistical code                                                                                                                                                                     | 19                             |
| <b>Appendices</b>                           |                      |                                                                                                                                                                                                                                                                                     |                                |
| Informed consent materials                  | <a href="#">#32</a>  | Model consent form and other related documentation given to participants and authorised surrogates                                                                                                                                                                                  | 15<br>(Supplementary Material) |
| Biological specimens                        | <a href="#">#33</a>  | Plans for collection, laboratory evaluation, and storage of biological specimens for genetic or molecular analysis in the current trial and for future use in ancillary studies, if applicable                                                                                      | 21<br>(Supplementary Material) |

None The SPIRIT Explanation and Elaboration paper is distributed under the terms of the Creative Commons Attribution License CC-BY-NC. This checklist can be completed online using <https://www.goodreports.org/>, a tool made by the [EQUATOR Network](#) in collaboration with [Penelope.ai](#)

Myeloma XIV Supplementary Material to Protocol Paper  
EudraCT number: **2018-003590-10**

Renal and Liver Function

As per standard of care, doses of lenalidomide and ixazomib should be adjusted at baseline according to liver and renal function. Regardless of which dosing arm has been assigned the doses indicated in this section should not be exceeded on cycle 1 day 1. Doses of lenalidomide reduced (based on renal function) can only be escalated, if tolerated, to the maximum dose indicated by the participant's assigned dosing arm/strategy after cycle 1 as per the lenalidomide SPC. Ixazomib doses may **not** be escalated, whether reduced based on renal or liver function.

Renal function:

Creatinine clearance should be calculated using the Cockcroft-Gault formula as the estimated GFR produced in most hospitals is not accurate in older patients. For moderate renal impairment, ixazomib should be given 4mg daily and should be reduced to 3mg in patients with severe renal impairment and end of stage renal disease. For moderate renal impairment, 10mg of Lenalidomide once daily should be given, 15 mg every other day for severe renal impairment and 5mg once daily at end stage renal disease.

|                           | Calculated creatinine Clearance (using Cockcroft-Gault formula) | Lenalidomide dose (Days 1-21)                                               | Ixazomib dose (Day 1, 8, 15) |
|---------------------------|-----------------------------------------------------------------|-----------------------------------------------------------------------------|------------------------------|
| Moderate renal impairment | ≥ 30 to < 50 ml/min                                             | 10mg once daily                                                             | 4mg once daily               |
| Severe renal impairment   | < 30 ml/min; not requiring dialysis                             | 15mg every other day                                                        | 3mg once daily               |
| End stage renal disease   | < 30 ml/min; requiring dialysis                                 | 5mg once daily (on dialysis days should be administered following dialysis) | 3mg once daily               |

Liver function:

The reduced ixazomib dose of 3 mg is recommended in patients with moderate liver dysfunction characterised by total bilirubin > 1.5-3 x ULN (patients with bilirubin > 3 x ULN are not eligible for the study). No dose reduction based on AST/ALT is required.

Lenalidomide has not formally been studied in patients with impaired hepatic function and there are no specific dose recommendations

Myeloma XIV Supplementary Material to Protocol Paper  
EudraCT number: **2018-003590-10**

Concomitant Medication

| <b>Permitted Concomitant Medication:</b>                                                       |                                                                                                                                                                                                                                                                                                                                                                  |
|------------------------------------------------------------------------------------------------|------------------------------------------------------------------------------------------------------------------------------------------------------------------------------------------------------------------------------------------------------------------------------------------------------------------------------------------------------------------|
| 1)                                                                                             | Antiemetics, including 5-HT3 serotonin receptor antagonists, may be used at the discretion of the investigator (however, note that dexamethasone additional to that given as part of the trial treatment schedule is <b>not</b> permitted).                                                                                                                      |
| 2)                                                                                             | Loperamide or other anti-diarrhoeal should be used for symptomatic non-infective diarrhoea at the discretion of the investigator. The dose and regimen will be according to institutional guidelines. Intravenous fluids should be given to prevent volume depletion.                                                                                            |
| 3)                                                                                             | Growth factors (e.g. granulocyte colony stimulating factor [G-CSF], thrombopoietin receptor agonists (TPO) and recombinant erythropoietin) are permitted at the discretion of the PI and/or institutional practice. Due consideration of the increased risk of VTE with TPO agonists and erythropoietin should be given and prophylaxis adjusted accordingly.    |
| 4)                                                                                             | Participants should be transfused with red cells and platelets as clinically indicated and according to institutional guidelines. Platelet transfusions are not allowed within 3 days prior to study drug dosing for any dosing day in order to meet pre-treatment criteria, to ensure that the platelet count is at a safe level to commence further treatment. |
| 5)                                                                                             | Patients known to be Hep B core antibody positive should receive prophylaxis with an appropriate anti-viral as per local protocols and after consultation with a gastroenterology/hepatology specialist.                                                                                                                                                         |
| 6)                                                                                             | Other supportive measures consistent with optimal participant care may be given throughout the study.                                                                                                                                                                                                                                                            |
| <b>Excluded concomitant Medication:</b>                                                        |                                                                                                                                                                                                                                                                                                                                                                  |
| 1)                                                                                             | Any antineoplastic treatment with activity against MM, other than study drugs and localised radiotherapy for pain relief.                                                                                                                                                                                                                                        |
| 2)                                                                                             | Platelet transfusions within 3 days prior to study drug dosing for any dosing day in order to meet pre-treatment criteria, or prior to randomisation in order to meet eligibility criteria.                                                                                                                                                                      |
| 3)                                                                                             | Additional steroid therapy (not as trial IMP) (except: before commencing trial treatment up to a maximum of 160 mg dexamethasone or equivalent based on glucocorticoid activity per inclusion criteria, or for the management of rash in which case topical, IC or oral steroid at a dose not exceeding prednisolone 10mg per day or equivalent is permitted)    |
| 4)                                                                                             | Radiotherapy for the treatment of symptoms related to disease progression (in the event of disease progression participant should stop trial treatment and further treatment will be at the discretion of the treating clinician).                                                                                                                               |
| 5)                                                                                             | Excluded foods and dietary supplements include St. John's Wort.                                                                                                                                                                                                                                                                                                  |
| 6)                                                                                             | Live vaccines are prohibited 30 days prior to R1 and for the duration of the study. They are also prohibited for 3 months after the last dose of study drug.                                                                                                                                                                                                     |
| The following treatments should be avoided, unless deemed necessary by the treating clinician: |                                                                                                                                                                                                                                                                                                                                                                  |
| 1)                                                                                             | Systemic treatment with any of the following metabolising enzyme inducers should be avoided, unless there is no appropriate alternative medication for the participant's use (Rationale: If there were to be a drug-drug interaction with an inducer, ixazomib exposure would be decreased):                                                                     |
| 2)                                                                                             | Strong CYP3A inducers: rifampicin, rifabutin, carbamazepine, phenytoin, & phenobarbital                                                                                                                                                                                                                                                                          |
| 3)                                                                                             | Non-steroidal anti-inflammatory drugs (NSAIDs) should be avoided especially in those with abnormal renal function unless the clinical benefit outweighs the risk to deteriorating renal impairment.                                                                                                                                                              |

Myeloma XIV Supplementary Material to Protocol Paper  
EudraCT number: **2018-003590-10**

### Exploratory analysis

Exploratory analysis will consider; the association of molecular subgroups with outcome through the investigation of frailty biomarkers, differences between the Karnofsky Performance Status (PS) and ECOG PS, and the prospective validation the UK-MRA MRP (United Kingdom-Myeloma Research Alliance Myeloma Risk Profile). All exploratory analysis to be conducted by the trial statisticians will be pre-specified in the statistical analysis plan.

### Subgroup analysis

A series of subgroup analyses will be conducted to determine whether a selection of patient characteristics, haematology / local serological results, biochemistry results and cytogenetic/molecular results as well as response assessments are prognostic of the endpoints; Progression-Free survival, Progression-free survival 2, overall survival, attainment of  $\geq$ VGPR (Very Good Partial Response) and attainment of Minimal Residual Disease (MRD) negativity, as defined for both randomisations. Note that the subgroups MRD response to IRD (Ixazomib, Lenalidomide and Dexamethasone) induction and MRD response at 12m maintenance will not be analysed for the attainment of MRD negativity endpoint.

#### Patient Characteristics

- Age at R1 baseline (<70,70-80,>80)
- Sex (Male / Female)
- ECOG performance status at R1 baseline (0,1,  $\geq$ 2, missing)
- Karnofsky performance status at R1 baseline (<80, 80-90,>90, missing)
- ISS at R1 baseline (Stage I, Stage II, Stage III, missing)
- R-ISS at R1 baseline (Stage I, Stage II, Stage III, missing)
- IMWG frailty category at R1 baseline (Fit, Unfit, Frail)
- MRP frailty category at R1 baseline (Fit, Intermediate-Fitness, Frail, missing)

#### Hematology / Local Serological Results

- Haemoglobin concentration at R1 baseline (<100,  $\geq$ 100 g/L)
- Platelets at R1 baseline (<150,  $\geq$ 150 x10<sup>9</sup>/L)
- White blood cells at R1 baseline (<LLN,  $\geq$ LLN, missing)
- Neutrophil count at R1 baseline (<LLN,  $\geq$ LLN)
- Lymphocyte count at R1 baseline (<LLN,  $\geq$ LLN, missing)
- Plasma cells (%) in bone marrow at R1 baseline (<60%,  $\geq$ 60%)

#### Biochemistry Results

- $\beta$ -2 microglobulin concentration at R1 baseline (<3.5, 3.5–<5.5,  $\geq$ 5.5mg/L)
- Serum creatinine concentration at R1 baseline (<175,  $\geq$ 175  $\mu$ mol/L)
- Corrected serum calcium concentration at R1 baseline (<2.75,  $\geq$ 2.75 mmol/L)
- Serum albumin at R1 baseline (<ULN,  $\geq$ ULN, missing)
- Lactate dehydrogenase at R1 baseline (<ULN,  $\geq$ ULN, missing)
- C-Reactive protein at R1 baseline (<ULN,  $\geq$ ULN, missing)
- Total bilirubin at R1 baseline (<ULN,  $\geq$ ULN)
- ALT/AST at R1 baseline (<ULN,  $\geq$ ULN)

Myeloma XIV Supplementary Material to Protocol Paper  
EudraCT number: **2018-003590-10**

MLPA Cytogenetic Results

- t(4,14) at R1 baseline (detected, not detected)
- t(14,16) at R1 baseline (detected, not detected)
- t(14,20) at R1 baseline (detected, not detected)
- del(17p) at R1 baseline (detected, not detected)
- del(13q) at R1 baseline (detected, not detected)
- del(1p) at R1 baseline (detected, not detected)
- gain(1q) at R1 baseline (detected, not detected)
- UK definition risk group at R1 baseline (Standard, high risk, ultra-high risk)
- IMWG definition risk group at R1 baseline (Adverse, Standard)

Response

- Response to IRD induction (<VGPR, ≥ VGPR)
- Response to 12m maintenance (<VGPR, ≥ VGPR)
- MRD response to IRD induction (MRD positive, MRD Negative)
- MRD response to 12m maintenance (MRD positive, MRD Negative)

Further subgroup analyses may be undertaken, as appropriate and all subgroup analysis will be fully documented in the statistical analysis plan. Subgroup and exploratory analyses may, by chance, generate false negative or positive results. Those carried out will be interpreted with caution.

Myeloma XIV Supplementary Material to Protocol Paper  
EudraCT number: **2018-003590-10**

Informed Consent Material

*Bone marrow and Blood sample consent form*

**Delete this line, then print on Trust/Hospital headed paper**

|                 |                         |
|-----------------|-------------------------|
| Participant ID: | Initials:               |
| Date of Birth:  | NHS/Hospital Number:    |
| EudraCT Number: | Principal Investigator: |

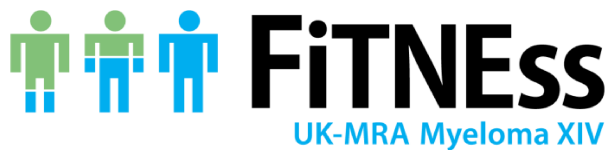

**PARTICIPANT CONSENT FORM FOR BONE MARROW AND BLOOD SAMPLE**

**Please initial  
each box**

1. I confirm that I have read and understand the information sheet for the bone marrow and blood sample request and have had the opportunity to ask questions.
2. I understand that my providing bone marrow and blood samples is voluntary and that I am free to withdraw at any time without my medical care or legal rights being affected.
3. I understand that the samples will be sent along with information about me, which will include NHS number and may include my name.
4. I agree to these samples being stored and used for research investigations that form part of the FiTNEss (UK-MRA Myeloma XIV) study, and understand that this will include genetic research.
5. I understand that a unique reference number will be allocated to the samples which may allow them to be linked back to me in future for research purposes.
6. I understand that my data may be shared on a collaborative basis with researchers in the UK and potentially, centres abroad, including outside the European Economic Area.

Myeloma XIV Supplementary Material to Protocol Paper  
EudraCT number: **2018-003590-10**

7. I agree to allow any information provided to be used for healthcare and/or further medical research upon the understanding that my identity will remain anonymous wherever possible.
8. I understand that results of my laboratory tests may be shared with other research teams if I am taking part in another clinical study being run by the University of Leeds.
9. I agree to a copy of this Consent Form being sent to the Clinical Trials Research Unit.
10. I agree for my details (which will include date of birth and NHS number) to be submitted to NHS Digital so that information about my health, and mortality should this become available, may be obtained by the CTRU if necessary.
11. I agree to provide bone marrow and blood samples.

**Please indicate your wishes in the below scenarios:**

Please tick or initial yes or no:

**Please tick ✓  
or initial**

A) If I am diagnosed with a plasma cell dyscrasia, other than myeloma, I give permission for the samples sent to the central laboratories to be stored and used in future research that receives ethical approval. I understand that the samples and data collected from them may be shared with researchers, possibly outside the EEA.

Yes No

B) If I am diagnosed with myeloma but do not take part in the FiTNEss (UK-MRA Myeloma XIV) study, I give permission for the samples sent to the central laboratories to be stored and used in future research that receives ethical approval. I understand that the samples and data collected from them may be shared with researchers, possibly outside the EEA.

Yes No



Myeloma XIV Supplementary Material to Protocol Paper  
EudraCT number: **2018-003590-10**

**Patient (to be completed by the patient):**

Signature.....

Name (block capitals).....

Date.....

**Investigator:**

I have explained the request to the above named patient and he/she has indicated his/her willingness for samples of bone marrow and blood to be sent to the FITNEss central laboratories.

Signature.....

Name (block capitals).....

Date.....

**(If used)Translator:**

Signature.....

Name (block capitals).....

Date.....

(1 copy for patient; 1 for the CTRU; 1 held in patient notes, original stored in Investigator Site File)

Myeloma XIV Supplementary Material to Protocol Paper  
EudraCT number: **2018-003590-10**

*Main Trial consent*

**Delete this line, then print on Trust/Hospital headed paper**

|                 |                         |
|-----------------|-------------------------|
| Participant ID: | Initials:               |
| Date of Birth:  | NHS/Hospital Number:    |
| EudraCT Number: | Principal Investigator: |

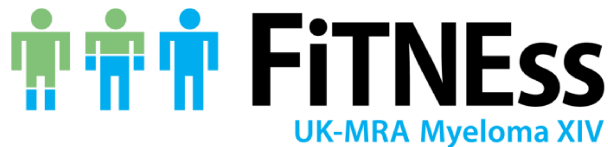

**PARTICIPANT CONSENT FORM**

*Please initial each box*

1. I confirm that I have read and understand the information sheet for the above study and have had the opportunity to ask questions.
  
2. I understand that my participation in this study is voluntary and that I am free to withdraw at any time without my medical care or legal rights being affected. I understand that even if I withdraw from the above study, the data and samples collected from me will be used in analysing the results of the study, and in some cases further information about any unwanted effects of my treatment may need to be collected by the study team.
  
3. I understand that my healthcare records may be looked at by authorised individuals from the study team, regulatory bodies or Sponsor in order to check that the study is being carried out correctly.
  
4. I understand that I will be asked questions about how independent my lifestyle is. I understand that this information will be used to generate a score of frailty and may affect the doses of treatment that I receive.
  
5. I am aware that I am required to have samples taken and sent to a central laboratory and I understand that this will include genetic research. I understand that the samples will be sent along with

Myeloma XIV Supplementary Material to Protocol Paper  
EudraCT number: **2018-003590-10**

information about me, which will include NHS number and may include my name.

6. I understand that results or reports from imaging scans, blood tests or other investigations (including for additional cancers) may be sent to the Clinical Trials Research Unit for central review by the research team.
7. I agree to allow any information or results arising from this study to be used for healthcare and/or further medical research upon the understanding that my identity will remain anonymous wherever possible.
8. I understand that my data and results of my laboratory tests (blood, urine and bone marrow sample collections) may be shared with other research teams if I am taking part in another clinical study being run by the University of Leeds.
9. I agree for my details (which will include date of birth and NHS number) to be submitted to NHS Digital so that information about my health, and mortality should this become available, may be obtained by the CTRU if necessary.
10. I understand that my GP, or any other doctor treating me, will be notified of my participation in this study.
11. I understand that some of my data may be passed to other organisations, such as the pharmaceutical companies Takeda and Celgene, (possibly in other countries outside the EEA where the data protection standards and laws may be different from the UK) to monitor the safety of the treatment(s) that I am receiving. I understand that my identity will remain anonymous.
12. I agree to a copy of this Consent Form being sent to the Clinical Trials Research Unit
13. I agree to take part in the study.

Myeloma XIV Supplementary Material to Protocol Paper  
EudraCT number: **2018-003590-10**

**The following parts of the study are OPTIONAL (see part 3 of the Participant Information Sheet).** Even if you agree to take part in the FiTNESs study, you do not have to agree to these optional parts. Please tick or initial yes or no.

Please tick ✓  
or initial

A) I agree to take part in the Quality of Life and Healthcare Resource Use studies by completing questionnaires at time points throughout the study.

Yes      No  
     

B) I give permission for samples that I provide to be used in future research that receives ethical approval, and I understand that this includes the blood and bone marrow samples provided at the time of my diagnosis (if consented separately to the bone marrow and blood sample for this study). I understand that my samples and data collected from them may be shared on a collaborative basis with researchers in the UK and potentially, centres abroad, including outside the European Economic Area.

Yes      No  
     

**Patient (to be completed by the patient):**

Signature.....

Name (block capitals).....

Date.....

**Investigator:**

I have explained the study to the above named patient and he/she has indicated his/her willingness to participate.

Signature.....

Name (block capitals).....

Date.....

**(If used)Translator:**

Signature.....

Name (block capitals).....

Date.....

Myeloma XIV Supplementary Material to Protocol Paper  
EudraCT number: **2018-003590-10**

### Central Sample Analysis

The trial has four central laboratories, each receiving samples for trial purposes. The time points and the reason for analysis for each central sample can be found in Figure 4. Details on the analysis of each sample is below. Note that participants can consent for their samples to be used in future research and hence each laboratory can store their trial samples for use in future studies. The storage details are also included below.

#### Birmingham

Samples are sent in approved packaging via the UK post office service and received in a UKAS accredited clinical laboratory for laboratory assessment and storage under the direction of the TMG. Assessment of prognostic markers, markers of disease activity and M-protein levels. Analyses will include serum levels of beta-2 microglobulin, immunoglobulins IgG, IgA and IgM, kappa and lambda free immunoglobulin light chains. Serum electrophoresis and immunofixation, M-protein quantitation including total protein and densitometry. Urine immunofixation and free light chain quantitation will be performed where appropriate.

#### HMDS

The presence of minimal residual disease will be assessed in bone marrow aspirates using a validated flow cytometry assay (sensitivity  $\leq 0.004\%$ ) performed at a single central laboratory (HMDS, Leeds Teaching Hospitals Trust). A minimum of 500,000 cells will be evaluated with six- or eight-colour antibody combinations including CD138, CD38, CD45, CD19, CD56, CD27, CD81 and CD117.

Sustained MRD-negativity, as defined by the IMWG [1], will not be assessed as it requires the participant to be imaging MRD-negative at the same timepoints that they are flow MRD-negative and imaging is only mandated at baseline and to investigate new systems not at regular intervals for all participants.

Flow MRD will be assessed at the following time points: Baseline (pre-randomisation 1), after 6 cycles of induction therapy, at the end of 12 cycles of induction treatment (or at the end of the final cycle of IRD treatment if sooner), at 12 months post maintenance randomisation 2. Flow MRD will also be assessed at any point a first occurrence of CR, or SCR is suspected.

During final analysis, we will determine the conversion rate of patients who are MRD Positive at the end of induction to MRD Negative at 12 months post Randomisation 2. The analysis to this is specified within our Statistical Analysis Plan (SAP).

Samples will be used for trial purposes only and will not be stored for future research.

#### ICR

Myeloma tumor material is purified from fresh bone marrow material using CD138 immunomagnetic separation. Tumor DNA and RNA are extracted and recurrent immunoglobulin translocations t(4;14), t(14;16), t(14;20) and copy number aberrations del(1p32), gain(1q21), del(17p) investigated as previously published using qRT-PCR and multiplex ligation-dependent amplification (MLPA), respectively[2]. Excess material is stored, if patient gave written consent for use in future research, at -80C standard DNA and RNA storage conditions.

#### LIMR

Myeloma XIV Supplementary Material to Protocol Paper  
EudraCT number: **2018-003590-10**

Peripheral blood samples for immunosenescent and Senescence-associated secretory proteome will be drawn and managed at timepoints in the clinical pathway, processed in a central laboratory and stored as aliquots of mononuclear cells and serum for subsequent planned use. Full QA is performed on sample receipt to ensure only viable and valuable samples are processed and stored for research use.

Myeloma XIV Supplementary Material to Protocol Paper  
EudraCT number: **2018-003590-10**

#### References

1. Kumar, S.P., et al., *International Myeloma Working Group consensus criteria for response and minimal residual disease assessment in multiple myeloma*. *The lancet oncology*, 2016. **17**(8): p. e328-e346.
2. Shah, V., et al., *Prediction of outcome in newly diagnosed myeloma: a meta-analysis of the molecular profiles of 1905 trial patients*. *Leukemia*, 2018. **32**(1): p. 102-110.
